# Supplementary material for: Technical note: An interactive dashboard to facilitate quality control of in-situ atmospheric composition measurements
Source: Copernicus journal article supplement (doi:10.5194/egusphere-2024-3556), 2024-12-11
Supplement: Supplementary file 1 [file egusphere-2024-3556-supplement.pdf]

# Supplement to Technical note: An interactive dashboard to facilitate quality control of in-situ atmospheric composition measurements

Yuri Brugnara<sup>1</sup>, Martin Steinbacher<sup>1</sup>, Simone Baffelli<sup>2</sup>, Lukas Emmenegger<sup>1</sup>

<sup>1</sup>Laboratory for Air Pollution / Environmental Technology, Empa, Dübendorf, 8600, Switzerland

<sup>2</sup>Scientific IT, Empa, Dübendorf, 8600, Switzerland

**Table S1: List of GAW stations supported by GAW-qc**

| GAW ID | Name                               | Latitude | Longitude | Elevation (m) |
|--------|------------------------------------|----------|-----------|---------------|
| ALT    | Alert                              | 82.4991  | -62.3415  | 185           |
| AMY    | Anmyeon-do                         | 36.5386  | 126.3300  | 42            |
| ARH    | Arrival Heights                    | -77.8301 | 166.6605  | 187           |
| BCK    | Behchoko                           | 62.7979  | -115.9183 | 184           |
| BHD    | Baring Head                        | -41.4082 | 174.8708  | 85            |
| BKT    | Bukit Kototabang                   | -0.2019  | 100.3181  | 864           |
| BMW    | Tudor Hill (Bermuda)               | 32.2700  | -64.8800  | 30            |
| BOS    | Boulder Table Mountain (CO)        | 40.1250  | -105.2370 | 1689          |
| BRA    | Bratt's Lake                       | 50.2016  | -104.7113 | 580           |
| BRW    | Barrow (AK)                        | 71.3230  | -156.6115 | 11            |
| CBY    | Cambridge Bay                      | 69.1284  | -105.0577 | 25            |
| CGO    | Kennaook / Cape Grim               | -40.6822 | 144.6883  | 94            |
| CGR    | Capo Granitola                     | 37.5711  | 12.6597   | 5             |
| CHC    | Chacaltaya                         | -16.2000 | -68.1000  | 5340          |
| CHL    | Churchill                          | 58.7379  | -93.8206  | 16            |
| CMN    | Monte Cimone                       | 44.1934  | 10.7010   | 2165          |
| CPA    | Cholpon-Ata                        | 42.6369  | 77.0675   | 1613          |
| CPS    | Chapais                            | 49.8216  | -74.9746  | 383           |
| CPT    | Cape Point                         | -34.3535 | 18.4897   | 230           |
| CVO    | Cape Verde Atmospheric Observatory | 16.8640  | -24.8675  | 10            |
| DCC    | Concordia, Dôme C                  | -75.0999 | 123.3335  | 3233          |
| DIG    | Diabla Gora / Puszcza Borecka      | 54.1500  | 22.0667   | 157           |
| EGB    | Egbert                             | 44.2310  | -79.7838  | 255           |
| ESP    | Estevan Point                      | 49.3829  | -126.5441 | 7             |

|     |                                                    |          |           |      |
|-----|----------------------------------------------------|----------|-----------|------|
| EST | Esther                                             | 51.6706  | -110.2063 | 707  |
| ETL | East Trout Lake                                    | 54.3537  | -104.9869 | 500  |
| EUK | Eureka                                             | 80.0500  | -86.4167  | 610  |
| FKL | Finokalia                                          | 35.3378  | 25.6694   | 150  |
| FSD | Fraserdale                                         | 49.8400  | -81.5167  | 210  |
| GAT | Gartow                                             | 53.0655  | 11.4427   | 69   |
| GLH | Giordan Lighthouse                                 | 36.0722  | 14.2184   | 167  |
| GSN | Gosan                                              | 33.2938  | 126.1628  | 71   |
| HBA | Halley                                             | -75.5715 | -25.5039  | 30   |
| HEL | Helgoland                                          | 54.1804  | 7.8832    | 43   |
| HFD | Heathfield                                         | 50.9767  | 0.2306    | 160  |
| HKG | Hok Tsui / Cape d Aguilar                          | 22.2094  | 114.2535  | 53   |
| HKO | King's Park                                        | 22.3119  | 114.1729  | 65   |
| HPB | Hohenpeissenberg                                   | 47.8015  | 11.0096   | 985  |
| HUN | Hegyhátsál háttérszennyettség-mérő állomás         | 46.9559  | 16.6521   | 248  |
| INU | Inuvik                                             | 68.3178  | -133.5342 | 107  |
| IRB | Iskrba                                             | 45.5612  | 14.8580   | 540  |
| IZO | Izaña (Tenerife)                                   | 28.3090  | -16.4994  | 2373 |
| JCZ | Jarczew                                            | 51.8167  | 21.9833   | 180  |
| JFJ | Jungfrauoch                                        | 46.5475  | 7.9851    | 3580 |
| JUE | Jülich                                             | 50.9102  | 6.4096    | 98   |
| KIT | Karlsruhe                                          | 49.1000  | 8.4380    | 111  |
| KMW | Kollumerwaard                                      | 53.3333  | 6.2667    | N/A  |
| KOS | Kosetice Observatory                               | 49.5833  | 15.0833   | 534  |
| KPS | Kecskemét K-puszta háttérszennyettség-mérő állomás | 46.9667  | 19.5833   | 125  |
| LAU | Lauder                                             | -45.0380 | 169.6840  | 370  |
| LEB | Leba                                               | 54.7500  | 17.5333   | 2    |
| LIN | Lindenberg                                         | 52.2167  | 14.1167   | 112  |
| LLB | Lac La Biche (Alberta)                             | 54.9538  | -112.4666 | 548  |
| LMP | Lampedusa                                          | 35.5182  | 12.6305   | 45   |
| MKN | Mt. Kenya                                          | -0.0622  | 37.2972   | 3678 |
| MLO | Mauna Loa (HI)                                     | 19.5362  | -155.5762 | 3397 |
| MNM | Minamitorishima                                    | 24.2883  | 153.9833  | 7    |
| NGL | Neuglobsow                                         | 53.1428  | 13.0333   | 62   |
| NMY | Neumayer                                           | -70.6660 | -8.2660   | 42   |
| NWR | Niwot Ridge - T-van (CO)                           | 40.0500  | -105.5900 | 3523 |
| OXK | Ochsenkopf                                         | 50.0301  | 11.8084   | 1185 |
| PAL | Pallas                                             | 67.9736  | 24.1158   | 560  |
| PAY | Payerne                                            | 46.8129  | 6.9435    | 490  |

|     |                                |          |           |      |
|-----|--------------------------------|----------|-----------|------|
| PDI | Pha Din                        | 21.5731  | 103.5157  | 1466 |
| PUY | Puy de Dôme                    | 45.7723  | 2.9658    | 1465 |
| RCV | Rucava                         | 56.1620  | 21.1732   | 18   |
| RGL | Ridge Hill                     | 51.9976  | -2.5400   | 204  |
| RIG | Rigi                           | 47.0674  | 8.4633    | 1031 |
| RUN | La Réunion                     | -21.0796 | 55.3841   | 2160 |
| RYO | Ryori                          | 39.0319  | 141.8222  | 260  |
| SMO | Samoa (Cape Matatula)          | -14.2475 | -170.5645 | 77   |
| SNB | SONNBLICK Observatory          | 47.0539  | 12.9589   | 3106 |
| SNZ | Sniezka                        | 50.7333  | 15.7333   | 1603 |
| SPO | South Pole                     | -89.9969 | -24.8000  | 2841 |
| SSL | Schauinsland                   | 47.9000  | 7.9167    | 1205 |
| STE | Steinkimmen                    | 53.0431  | 8.4588    | 29   |
| SUM | Summit                         | 72.5800  | -38.4800  | 3238 |
| SVT | Svratouch                      | 49.7333  | 16.0333   | 737  |
| SYO | Syowa                          | -69.0053 | 39.5811   | 29   |
| TAC | Tacolneston Tall Tower         | 52.5177  | 1.1386    | 56   |
| THD | Trinidad Head (CA)             | 41.0541  | -124.1510 | 107  |
| TIK | Tiksi                          | 71.5862  | 128.9188  | 8    |
| TLL | El Tololo                      | -30.1683 | -70.8036  | 2154 |
| TOH | Torfhaus                       | 51.8088  | 10.5350   | 801  |
| ULD | Ulleungdo                      | 37.4800  | 130.9000  | 221  |
| USH | Ushuaia                        | -54.8485 | -68.3107  | 18   |
| WES | Westerland                     | 54.9231  | 8.3080    | 12   |
| WLG | Mt. Waliguan                   | 36.2875  | 100.8963  | 3810 |
| WSA | Sable Island                   | 43.9326  | -60.0086  | 2    |
| YON | Yonagunijima                   | 24.4667  | 123.0106  | 30   |
| ZEP | Zeppelin Mountain (Ny Ålesund) | 78.9067  | 11.8893   | 475  |
| ZRN | Zavodnje                       | 46.2600  | 15.0000   | 770  |
| ZSF | Zugspitze-Schneefernerhaus     | 47.4165  | 10.9796   | 2666 |
| ZSN | Zoseni                         | 57.1351  | 25.9056   | 183  |

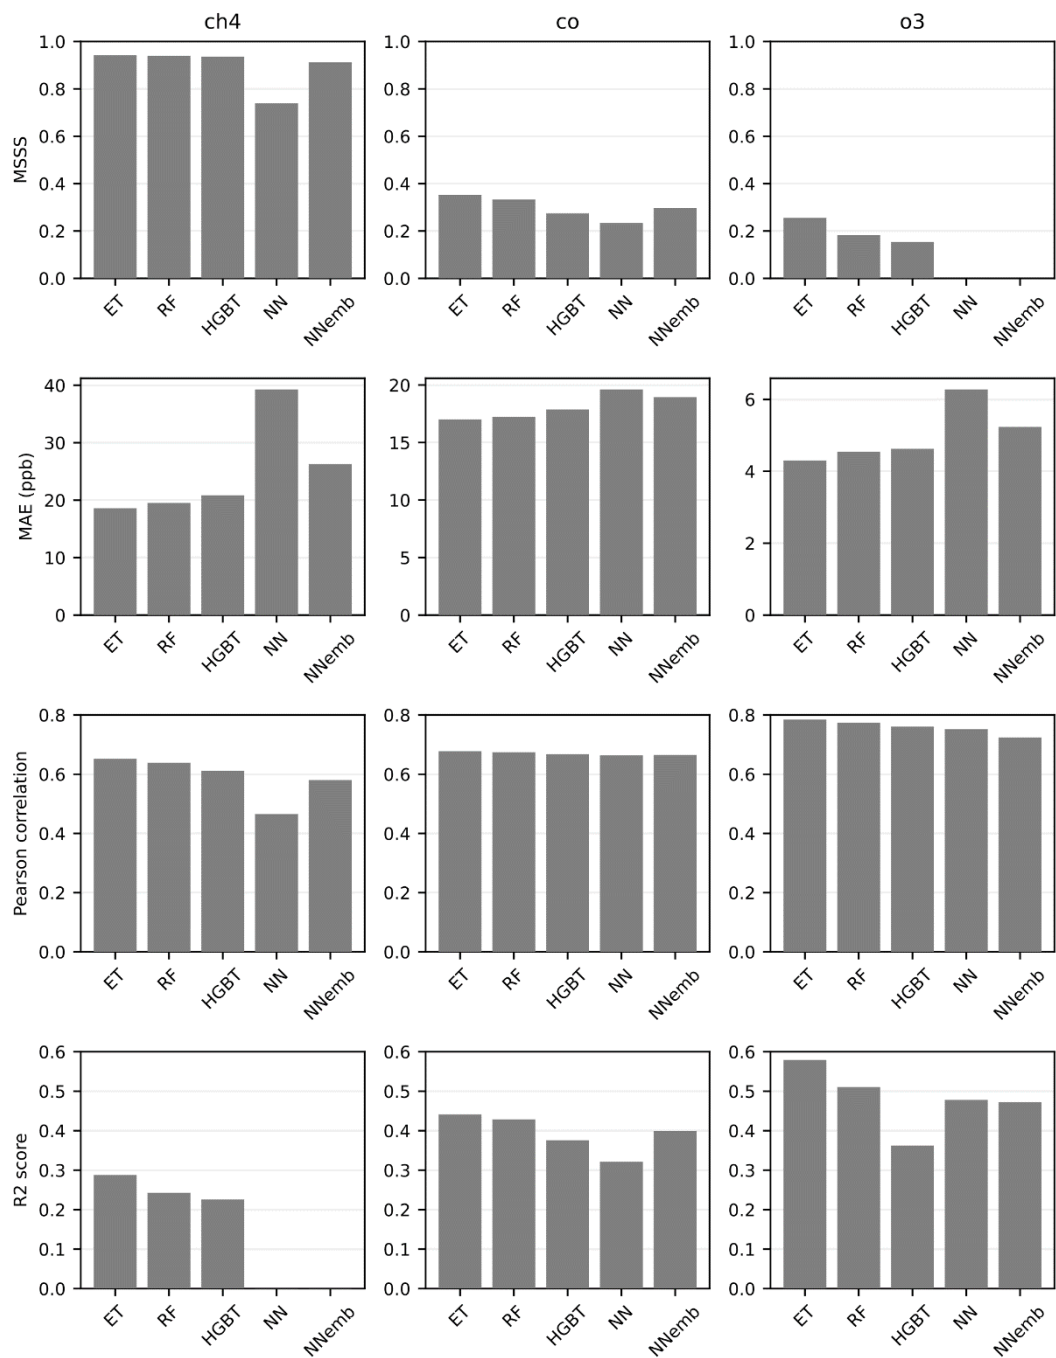

**Figure S1: Performance of five tested regression models (ET=Extra-Trees; RF=Random Forest; HGBT=Histogram-based Gradient Boosting; NN=feedforward Neural Network with two hidden layers; NNemb=feedforward Neural Network with three hidden layers and stations as embedded variable) for the same sets of GAW stations (27 stations for CH<sub>4</sub>, 24 stations for CO, 30 stations for O<sub>3</sub>). All models were trained over the period 2020-2022 and validated using the year 2023. Negative scores are omitted.**

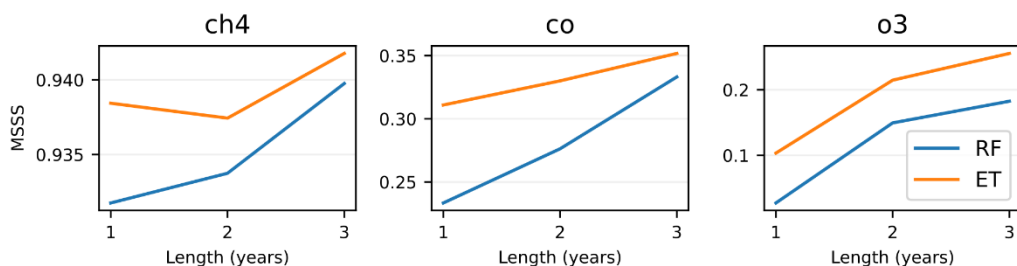

**Figure S2: Average Mean Squared Skill Score (MSSS) at available GAW stations using training periods of different length (all ending on 31.12.2022) to predict the measurements of 2023 (RF = Random Forest; ET = Extra-Trees)**

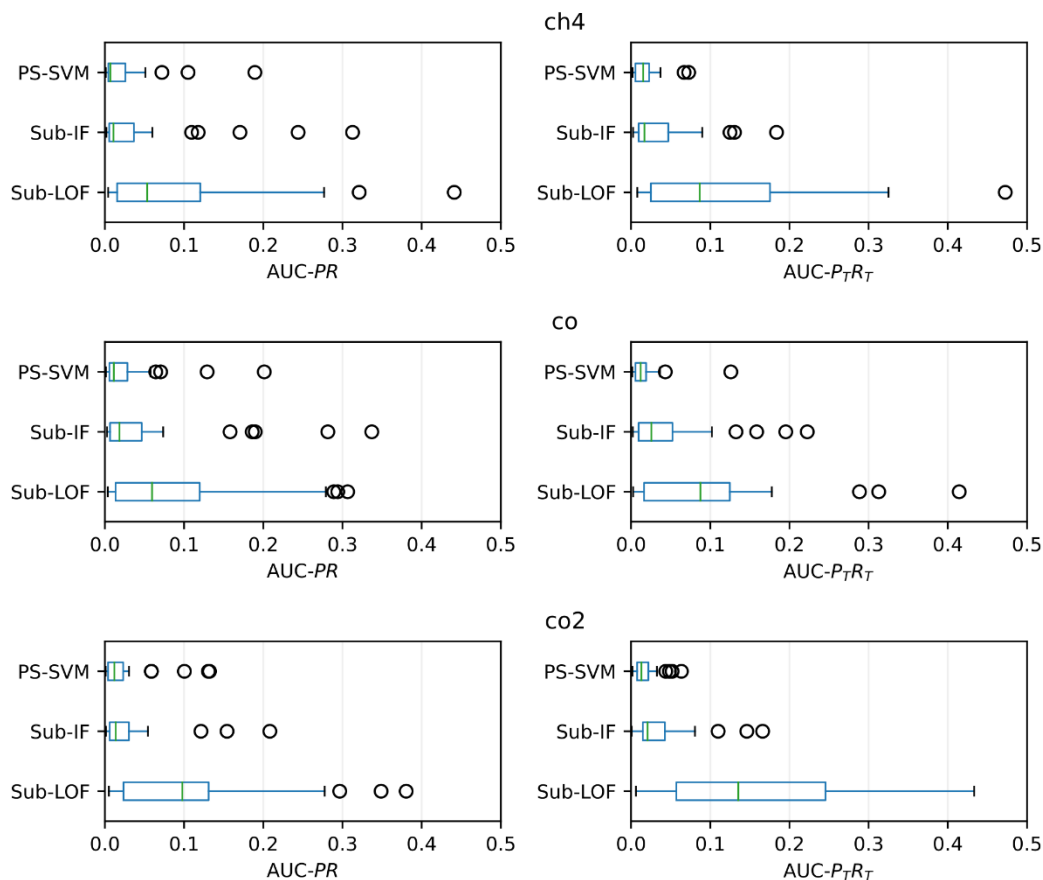

**Figure S3: Distribution of the Area Under the Precision-Recall Curve (AUC-PR) score (left column: classic; right column: range-based) for three different outlier detection methods for sequences (for  $n_s=5$  and  $k=100$ ) based on ICOS stations that have at least 30 flags in Level 2 data between April 2021 and March 2024 (for towers the largest available inlet height is used). The green lines indicate the median of the tested stations, the boxes indicate the interquartile range (IQR), while the whiskers extend to up to 1.5 IQR from the edges of the boxes.**

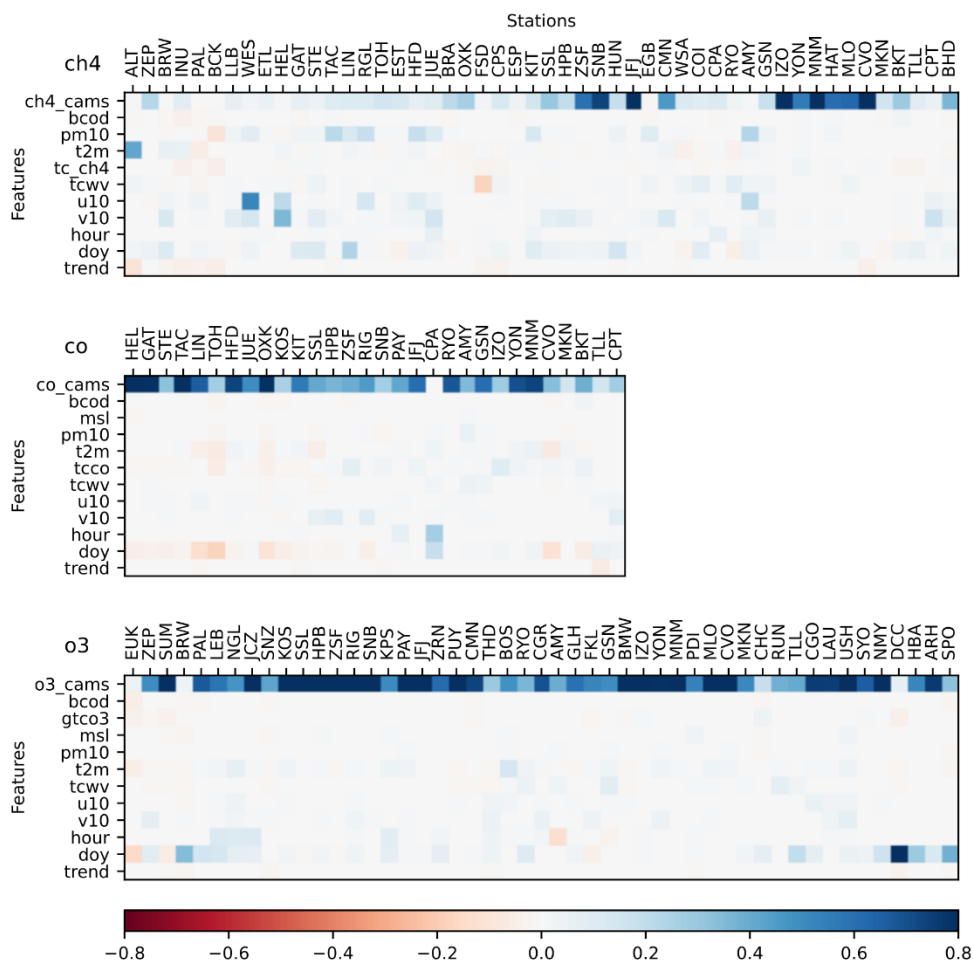

**Figure S4: Minimum feature importance for the three available gas species at validation stations (identified by the GAW code and ordered by decreasing latitude), based on 2020-2023 data and the MSSS. The feature importance is calculated separately for each year and then the minimum of the yearly values is taken (at least 3 years required). For tower stations the highest sampling height is used. For station names and coordinates see Table S1.**
